# Supplementary material for: Hydrogeochemical impact of Opalinus Clay system shown in migration lengths of uranium
Source: Copernicus journal article supplement (doi:10.5194/sand-2-147-2023), 2023-09-06
Supplement: Supplementary file 1 [file sand-2-147-2023-supplement.pdf]

Supplement of Saf. Nucl. Waste Disposal, 2, 147–147, 2023  
<https://doi.org/10.5194/sand-2-147-2023-supplement>  
© Author(s) 2023. CC BY 4.0 License.

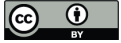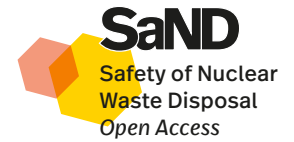

*Supplement of*

## **Hydrogeochemical impact of Opalinus Clay system shown in migration lengths of uranium**

**Theresa Hennig and Michael Kühn**

*Correspondence to:* Theresa Hennig ([theresa.hennig@gfz-potsdam.de](mailto:theresa.hennig@gfz-potsdam.de))

The copyright of individual parts of the supplement might differ from the article licence.

# Hydrogeochemical impact of Opalinus Clay system shown in migration lengths of uranium

Theresa Hennig<sup>1</sup> and Michael Kühn<sup>1,2</sup>

<sup>1</sup> GFZ German Research Centre for Geosciences, Potsdam, Germany

<sup>2</sup> University of Potsdam, Institute of Geosciences, Potsdam, Germany

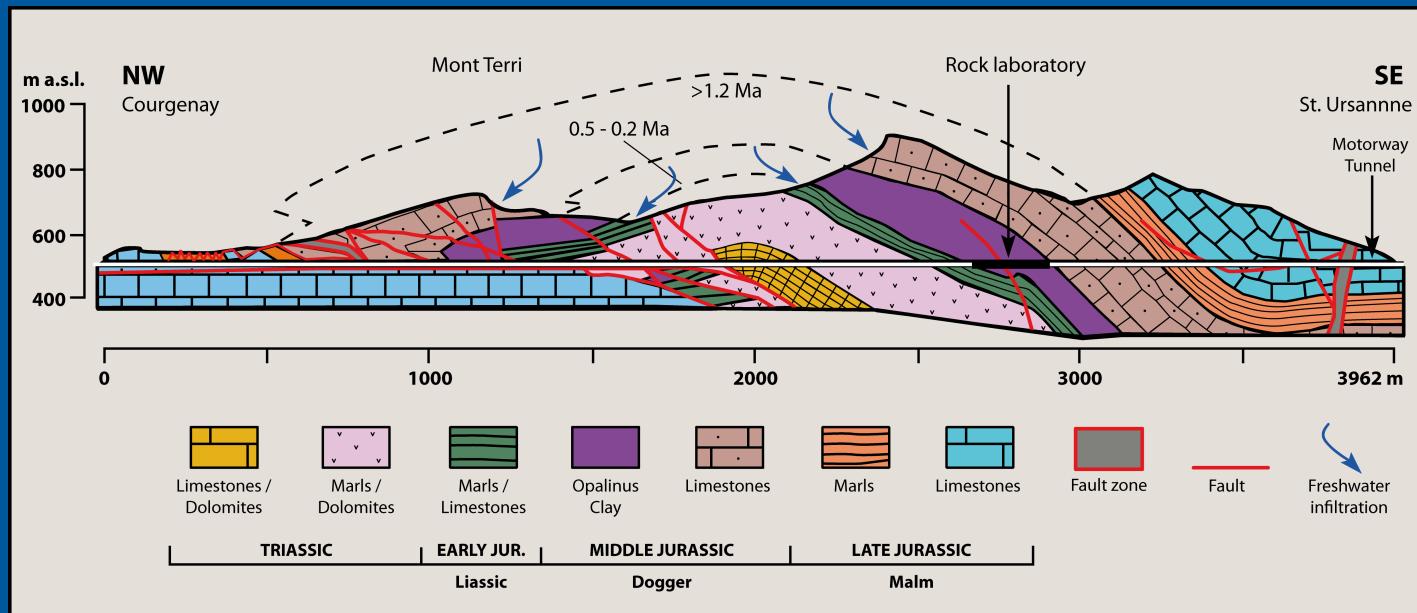

# Quantifying radionuclide migration essential for safety assessments of potential nuclear waste disposals

- Host rocks are natural and **final barrier** isolating radionuclides from human environment
- **Numerical simulations** are only way to cover spatial (>100 m) and temporal (1 Ma) scales **required**
- Focus on **migration** of **uranium**, the main component of spent fuel, in potential host rock **Opalinus Clay**

Data from various scales required:

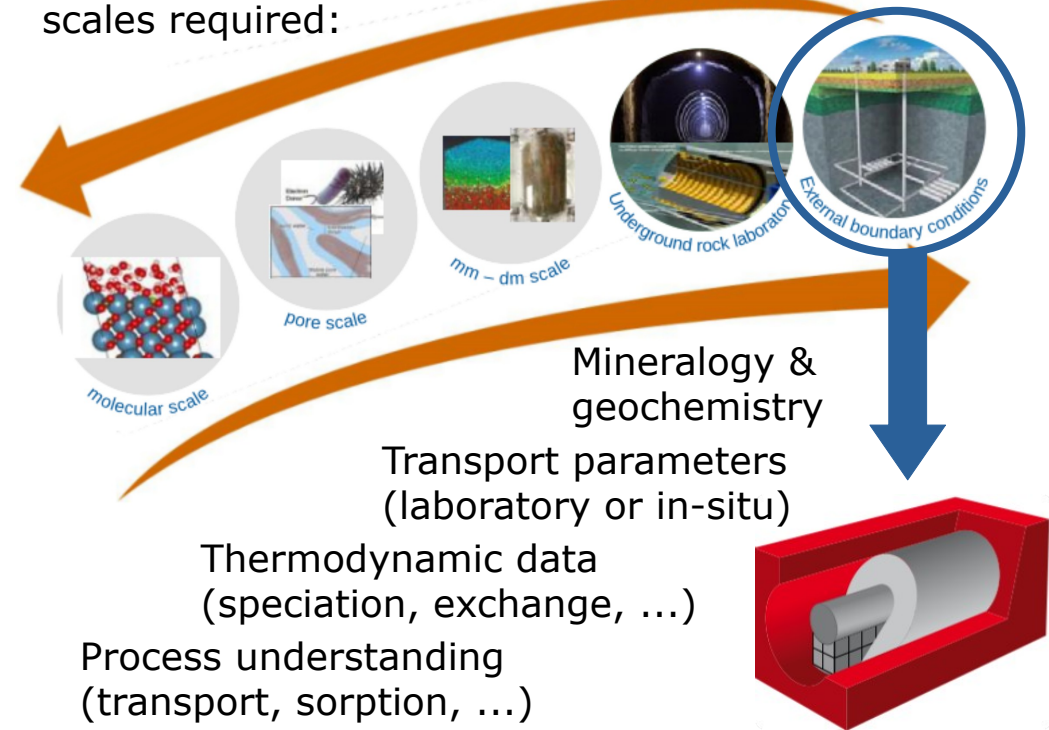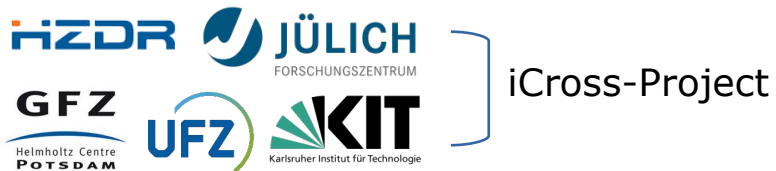

# Opalinus Clay is heterogeneous in mineralogy and pore water geochemistry

How can radionuclide migration be quantified with transport simulations?

→ Classical approaches apply Fick's 2<sup>nd</sup> law:

$$\frac{\partial C}{\partial t} = \frac{D_e}{(\epsilon + K_d \rho_b)} \cdot \frac{\partial^2 C}{\partial x^2}$$

Species concentration / Time = Effective diffusion coefficient / (Accessible porosity + Distribution coefficient · Dry bulk density) · Spatial coordinate

→ Experimentally determined for geochemically and mineralogically constant boundary conditions

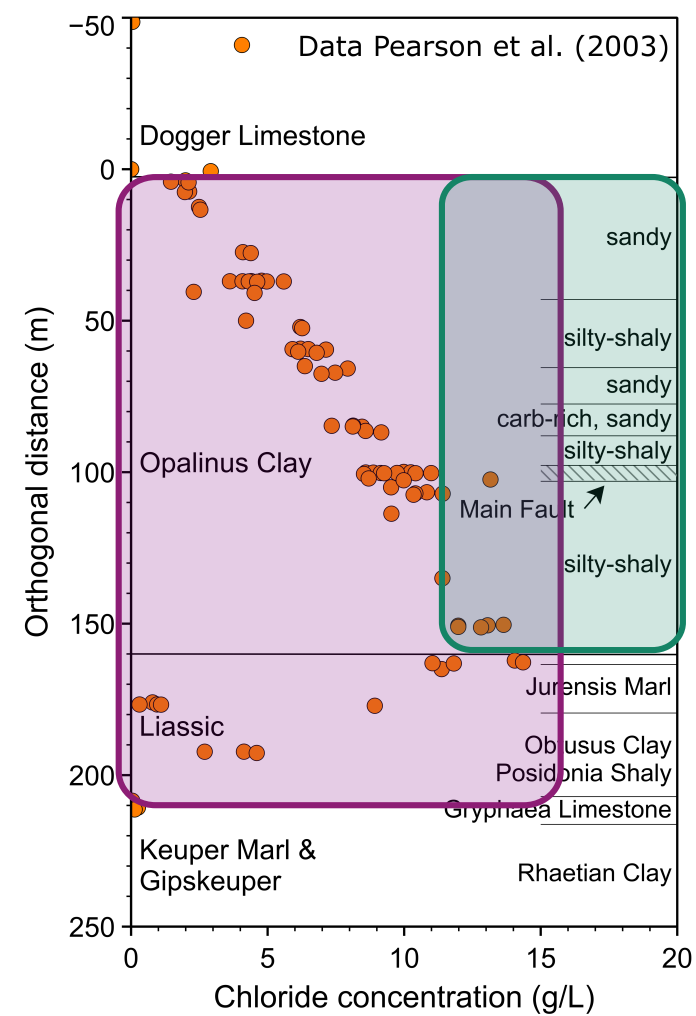



# Sorption of uranium species quantified based on competitive effects from individual clay minerals

- 1D continuum scale simulations are conducted with PHREEQC on laboratory and host rock scale
- Diffusion is quantified with single-component approach following Fick's diffusion
- Sorption processes integrated via cation exchange and mechanistic surface complexation models
- Geochemical and mineralogical data stems from borehole analysis at Mont Terri
  - Pore water geochemistry controlled by equilibrium with carbonates and pyrite

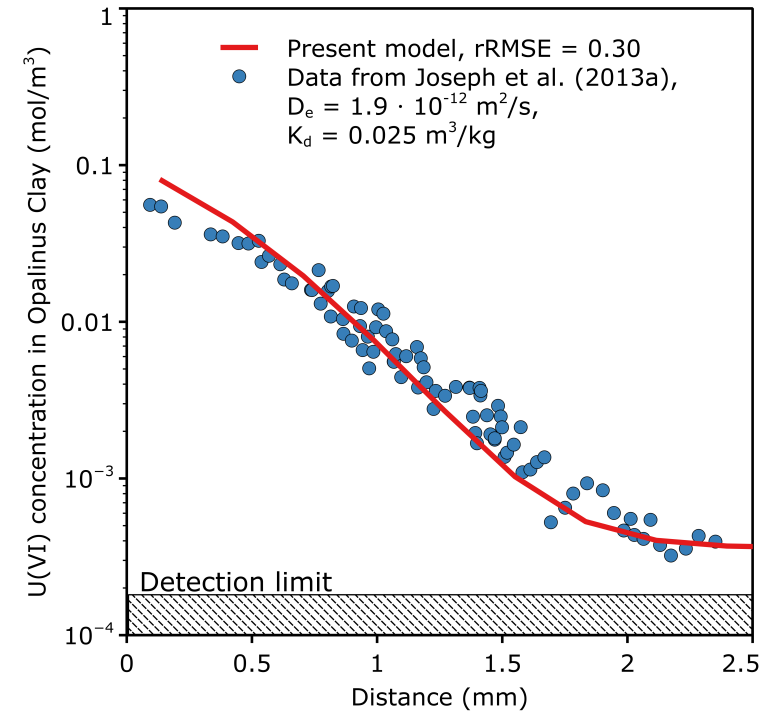

# Geochemical behaviour of Opalinus Clay and uranium speciation depend on calcite-carbonate ion system

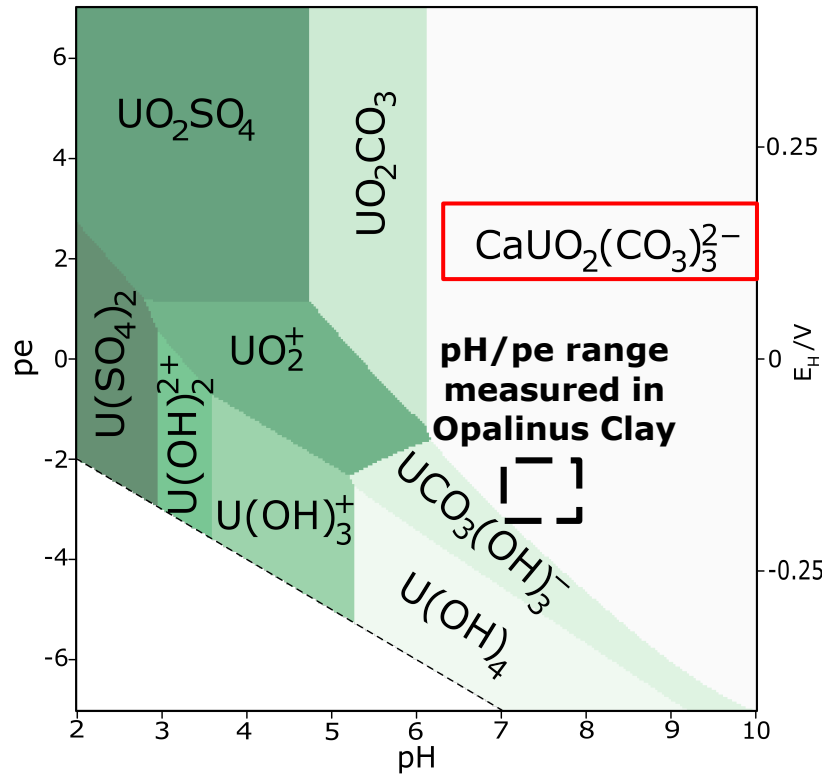

- Uranium >90% present as U(VI)

| Species                                 | Mol fraction (%) |
|-----------------------------------------|------------------|
| $\text{CaUO}_2(\text{CO}_3)_3^{2-}$     | 70               |
| $\text{MgUO}_2(\text{CO}_3)_3^{2-}$     | 16               |
| $\text{Ca}_2\text{UO}_2(\text{CO}_3)_3$ | 6                |

→ Regarded as **mobile**

- Pore waters equilibrated for  $\text{pCO}_2$  range between -2.5 and -2.0 log bar

→ **Correspond to measured values** and recommended for clay formations

# Dissolved concentrations of $\text{CO}_2$ and $\text{Ca}^{2+}$ more decisive for uranium sorption than pH

- Uranium migrates farther with:
  - decreasing clay mineral quantity
  - increasing  $\text{pCO}_2$
- Observed uranium migration varies up to 10 m between individual facies
- Uranium sorption governed by:

1.  $\text{pCO}_2$
2.  $\text{Ca}^{2+}$  concentration
3. pH
4. Clay mineralogy

Geochemistry of pore water controls sorption processes

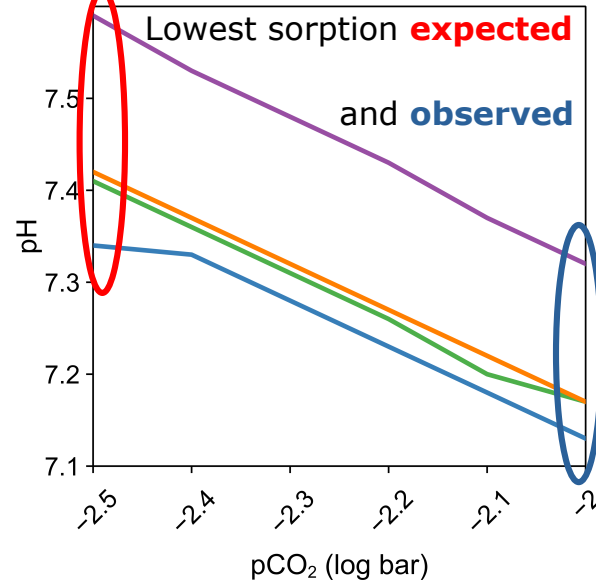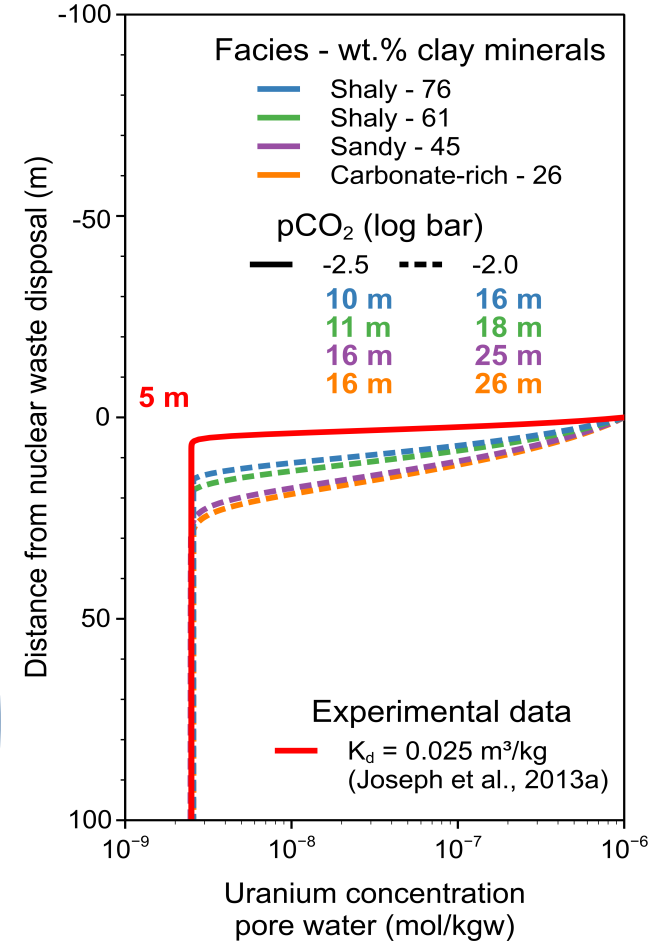

# Erosion history of the Mont Terri anticline and associated fresh water infiltration activated the hydrogeological boundaries

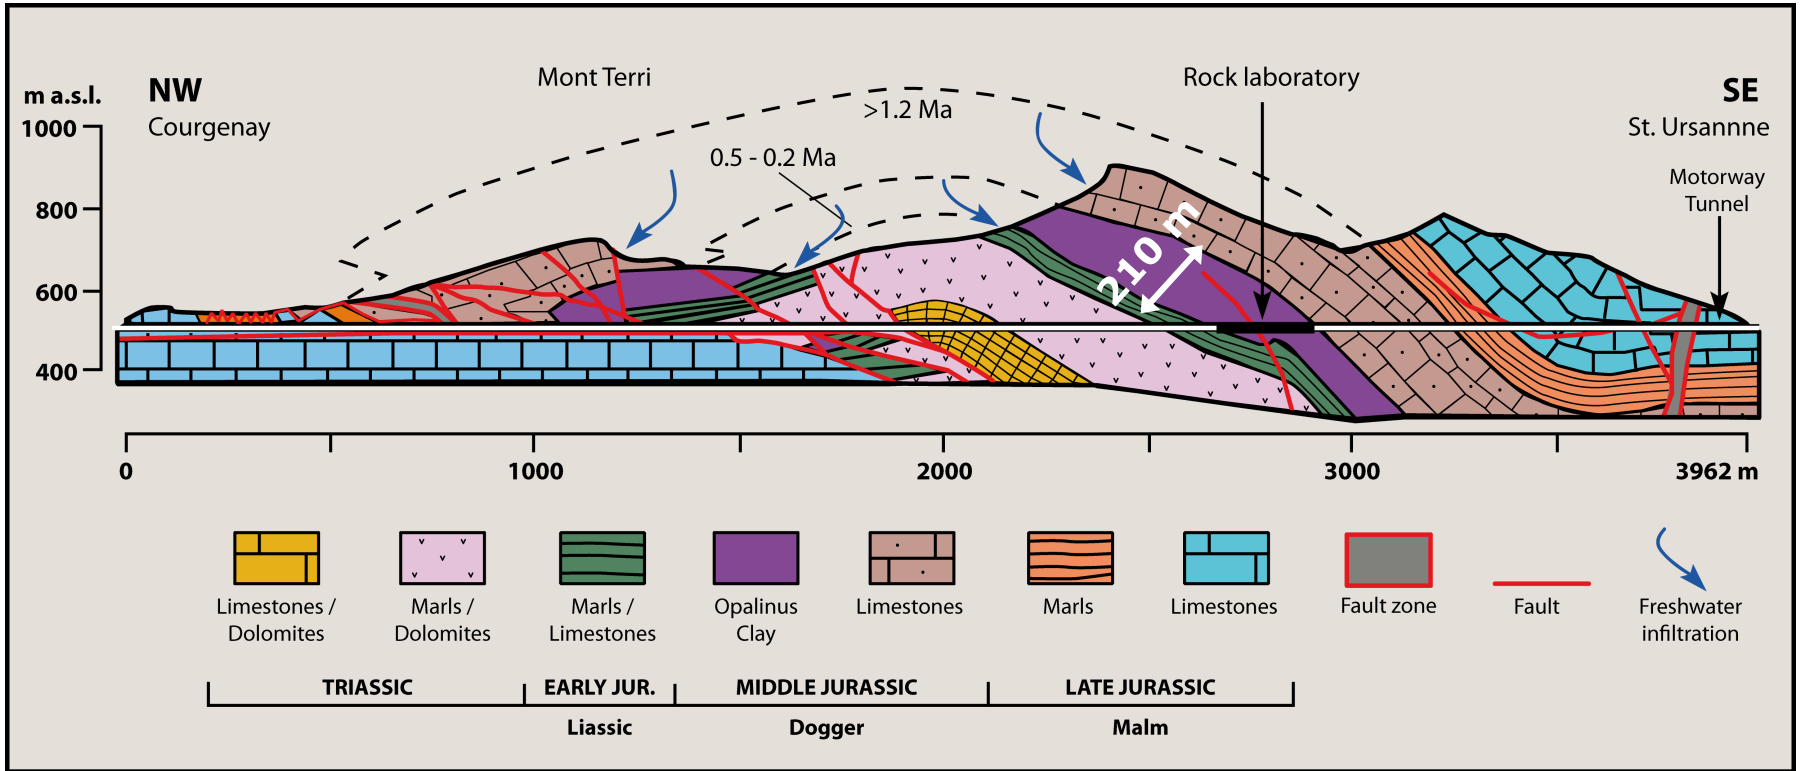

# Considering geochemical gradients enhances uranium migration

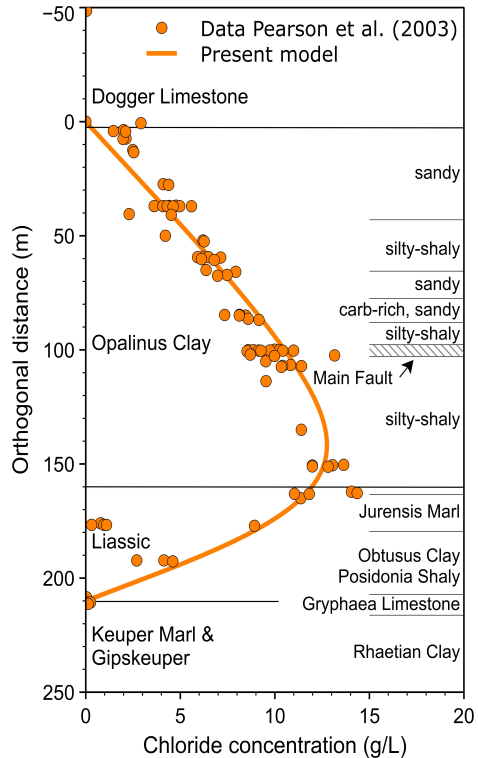

Sorption capacity (given as calculated  $K_d$  values) decreases with gradients,

and thus experimentally determined  $K_d$  values are not applicable

Sorption of uranium governed by:

1.  $pCO_2$  ( $\pm 10$  m)
2. Hydrogeology ( $\pm 25$  m)
3. Clay mineralogy ( $\pm 10$  m)

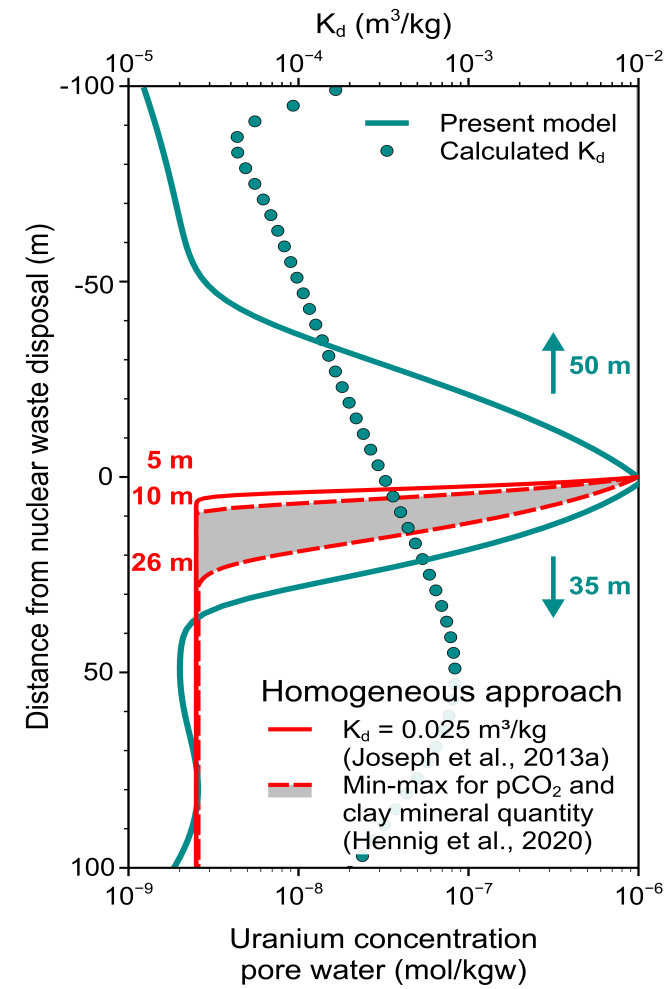

# Thermodynamic data influence speciation and migration models

NEA published update of thermodynamic data:

| Species                                 | Mol fraction (%) using NEA data of |                       |
|-----------------------------------------|------------------------------------|-----------------------|
|                                         | Guillaumont et al. (2003)          | Grenthe et al. (2020) |
| $\text{CaUO}_2(\text{CO}_3)_3^{2-}$     | 70                                 | 10                    |
| $\text{MgUO}_2(\text{CO}_3)_3^{2-}$     | 16                                 | 2                     |
| $\text{Ca}_2\text{UO}_2(\text{CO}_3)_3$ | 6                                  | 88                    |

→ Stronger complexation with carbonate and calcium decreases proportion of uranium available for sorption

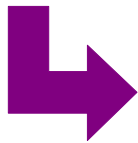

Sorption of uranium governed by:  
**0. Thermodynamic data ( $\pm 30$  m)**  
 1.  $\text{pCO}_2$  ( $\pm 10$  m)  
 2. Hydrogeology ( $\pm 25$  m)  
 3. Clay mineralogy ( $\pm 10$  m)

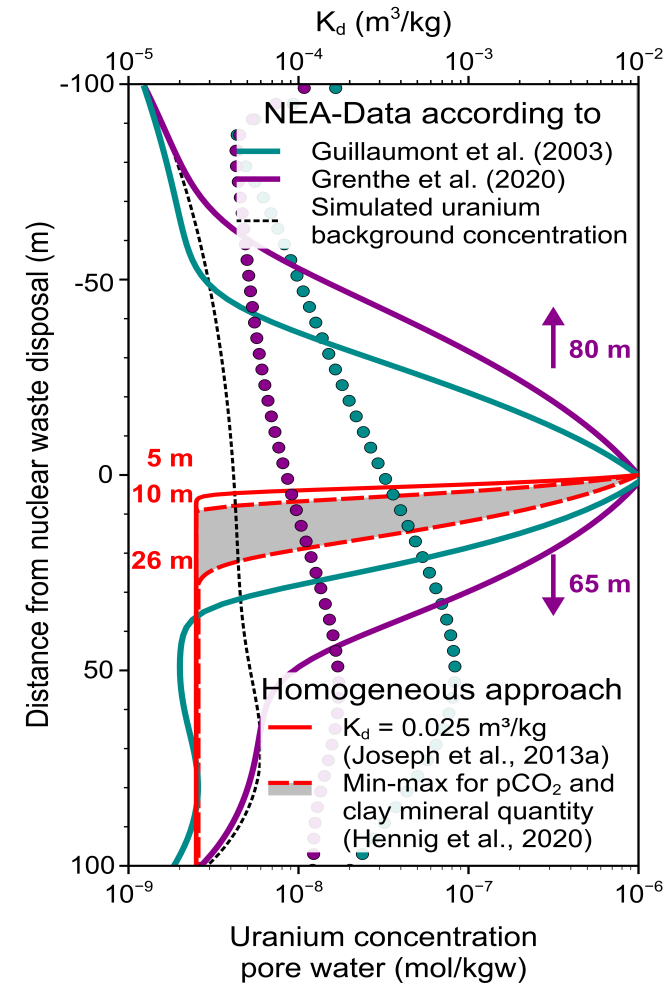

# Are geochemical gradients present at the potential disposal sites?

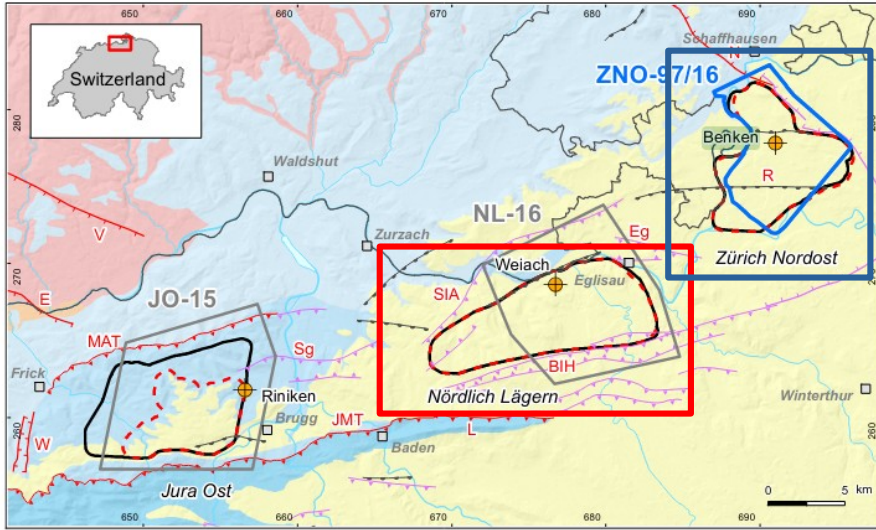

Sorption of uranium governed by:

- 0. Thermodynamic data ( $\pm 30$  m) !
- 1.  $p\text{CO}_2$  ( $\pm 10$  m) !
- 2. Hydrogeology ( $\pm 25$  m) ✓
- 3. Clay mineralogy ( $\pm 10$  m) ✓

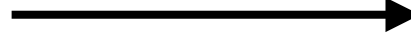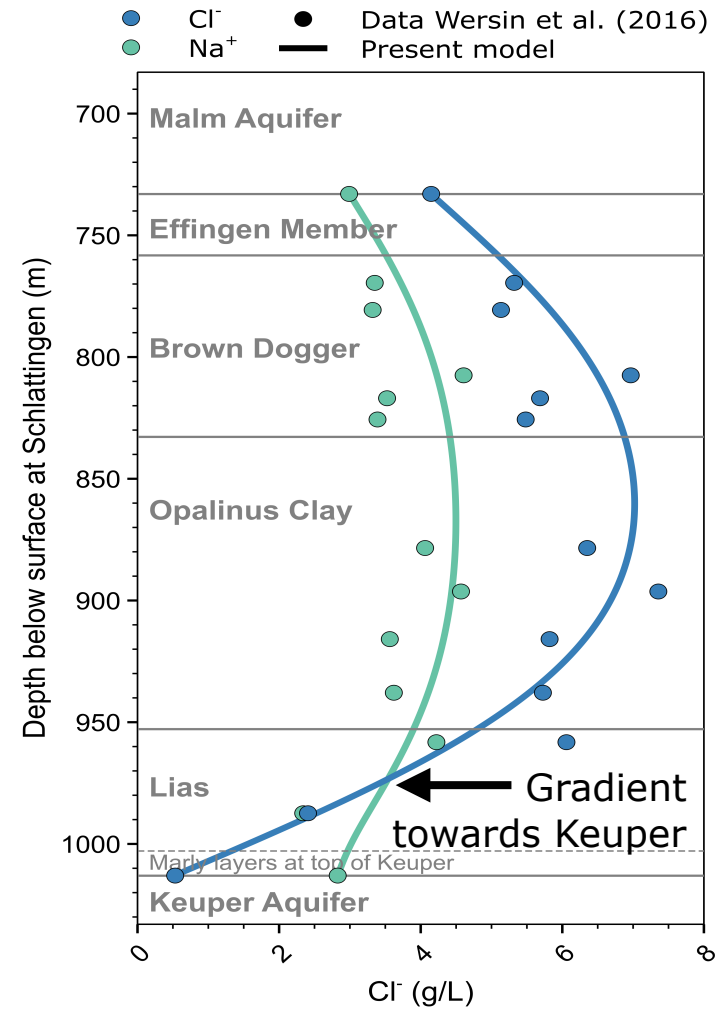

# Uranium migration depends on pore water composition, geochemical gradients and source term concentration

●  $\text{Cl}^-$     ● Data Wersin et al. (2016)  
●  $\text{Na}^+$     — Present model

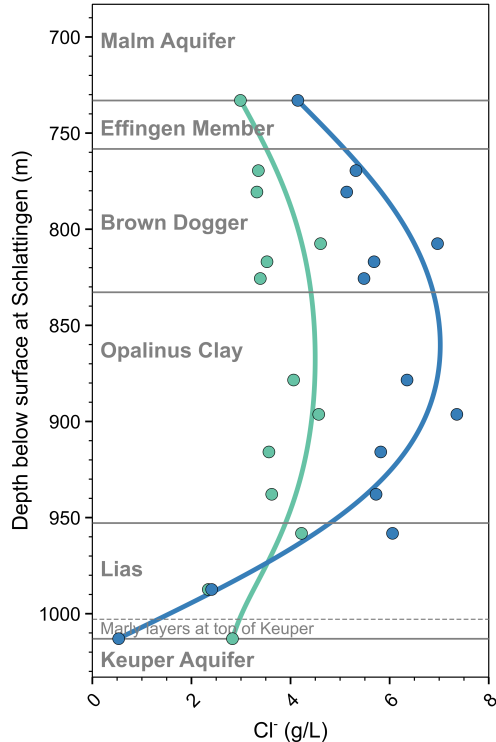

Maximum chloride concentration at Mont Terri  $\sim 15$  g/L

Migration lengths depend on spatial and temporal variation of hydrogeology and geochemistry

→ stable conditions enable application of  $K_d$  approach to quantify radionuclide migration

→  $K_d$  values need to be determined for in-situ conditions ( $p\text{CO}_2$ )

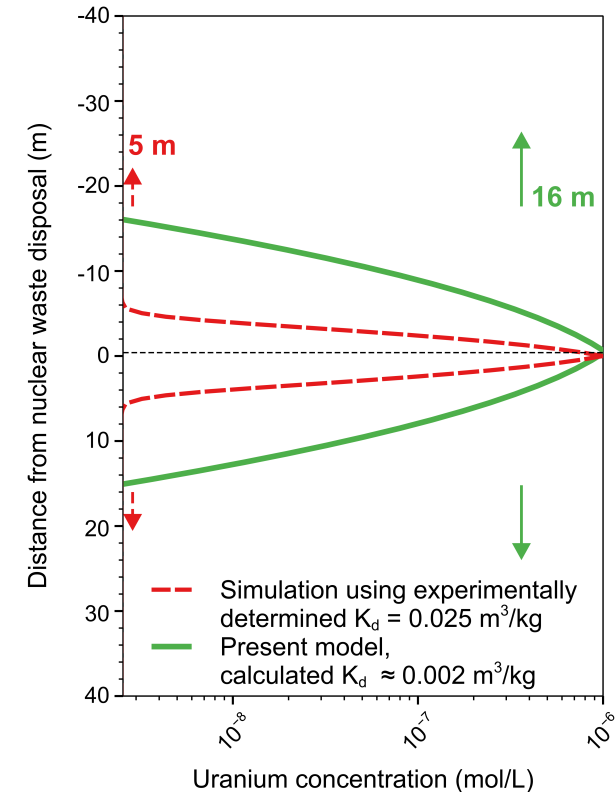



# Uranium sorption governed by thermodynamic data and the hydrogeochemical system and less by clay mineralogy

Following points arise due to the range of migration lengths (5 m – 80 m) resulting from reactive transport simulations:

- Hydrogeological system always affects geochemistry and must be considered in safety assessments
- Geological, physical and hydrogeochemical systems are not in a stationary state and constant changes need to be considered
- Coupled models to state questions and formulate hypothesis
  - Geological input data are always inaccurate to a certain degree
  - Experimentally determined data are subject to simplification
  - Data may be missing that is needed for building a model
- Degree of reliability of models derived from comparison with laboratory tests and data from boreholes and underground labs

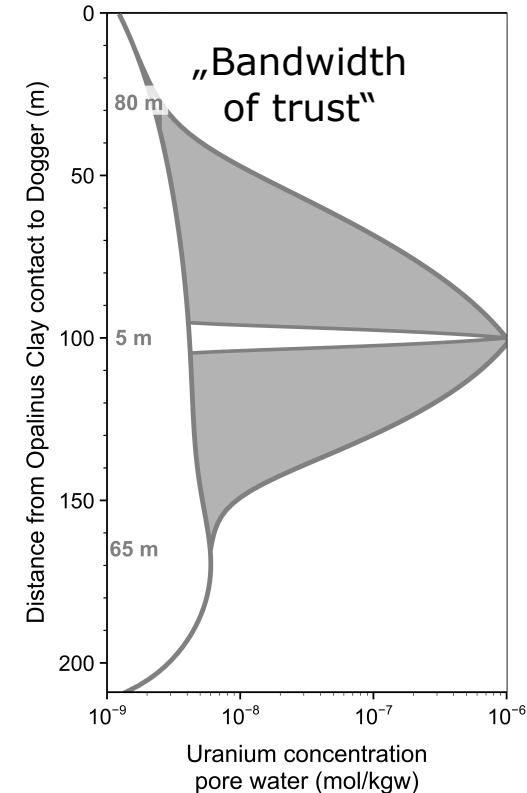

# References

De Lucia, M. and Kühn, M. (2021): *Advances in Geosciences* 56, 33–43. DOI: 10.5194/adgeo-56-33-2021.

Freivogel, M. and Huggenberger, P. (2003): *Reports of the FOWG, Geology Series, no 4.: Mont Terri Project – Geology , paleohydrology and stress field of the Mont Terri region*, 7–44.

Hennig, T. (2022): *Dissertation, University of Potsdam*, <https://publishup.uni-potsdam.de/frontdoor/index/index/docId/55270>.

Hennig, T. and Kühn, M. (2021): *Minerals* 11 (10), 1087. DOI: 10.3390/min11101087.

Hennig, T. and Kühn, M. (2022): *Advances in Geosciences*, 58, 11–18, DOI: 10.5194/adgeo-58-11-2022.

Hennig, T. and Kühn, M. (2023): *Advances in Geosciences* (accepted for publication).

Hennig, T. et al. (2020): *Applied Geochemistry* 123, 104777. DOI: 10.1016/j.apgeochem.2020.104777.

Joseph, C. et al. (2013a): *Geochimica et Cosmochimica Acta* 109, 74–89. DOI: 10.1016/j.gca.2013.01.027.

Joseph, C. et al. (2013b): *Applied Geochemistry* 36, 104–117. DOI: 10.1016/j.apgeochem.2013.06.016.

Nagra (2007): *Nagra Themenhefte no. 1*. Wetingen, Switzerland: Nagra, <https://nagra.ch/downloads/>.

Nagra (2022): *Nagra Arbeitsbericht NAB 22-01*, Wetingen, Switzerland: Nagra, <https://nagra.ch/downloads/>.

Noseck, U. et al. (2012): *GRS-297*. Cologne and Dresden, Germany: GRS and HZDR.

Pearson, F. J. et al. (2003): *Reports of the FOWG, Geology Series no. 5*. Bern, Switzerland: Federal Office for Water and Geology (FOWG).

Wersin, P. et al. (2016): *Chemical Geology*, 434, 43–61, DOI: 10.1016/j.chemgeo.2016.04.006.
